# Supplementary material for: Bicarbonate and functional CFTR channel are required for proper mucin secretion and link cystic fibrosis with its mucus phenotype
Source: PubMed Central journal article supplement — J Exp Med. 2012 Jul 2;209(7):1263–72. doi: 10.1084/jem.20120562 (PMC3405509; doi:10.1084/jem.20120562), 2012-07-02
Supplement: supp_jem.20120562_JEM_20120562_sm.pdf [file supp_jem.20120562_JEM_20120562_sm.pdf]

## SUPPLEMENTAL MATERIAL

Gustafsson et al., <http://www.jem.org/cgi/content/full/jem.20120562/DC1>

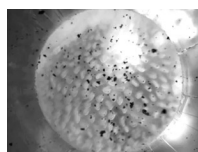

**Video 1.** Aspiration of mucus visualized with charcoal from WT mouse ileal tissue mounted in the horizontal chamber. The first and last images of this video are shown in Fig. 1 C.

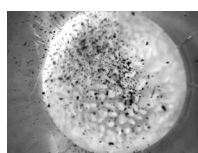

**Video 2.** The difficulty in aspirating mucus visualized with charcoal from CF (Cftr $\Delta$ 508) mouse ileal tissue mounted in the horizontal chamber. The first and last images of this video are shown in Fig. 1 D.

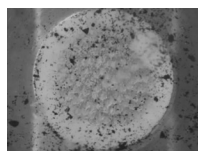

**Video 3.** The difficulty in aspirating mucus visualized with charcoal from WT mouse ileal tissue mounted in the horizontal chamber in the absence of serosal HCO<sub>3</sub><sup>-</sup>. The first and last images of this video are shown in Fig. 3 B.

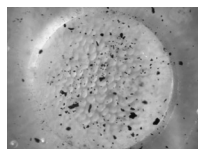

**Video 4.** The aspiration of mucus secreted into apical buffer containing 115 mM HCO<sub>3</sub><sup>-</sup> on CF (Cftr $\Delta$ 508) mouse ileal tissue mounted in the horizontal chamber. The mucus was visualized with charcoal. The first and last images of this video are shown in Fig. 4 C.

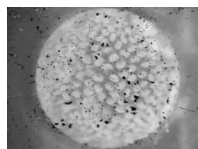

**Video 5.** The aspiration of already formed mucus treated with 115 mM HCO<sub>3</sub><sup>-</sup> on CF (Cftr $\Delta$ 508) mouse ileal tissue mounted in the horizontal chamber. Mouse ileal tissue was mounted in the horizontal chamber, the apical buffer was replaced with a buffer containing 115 mM NaHCO<sub>3</sub>, and the formed mucus on the CF ileal explant was incubated for 30 min before the video showing the aspiration of mucus was recorded. The mucus was visualized with charcoal. The first and last images of this video are shown in Fig. 5 C.
